# Supplementary material for: A subtle structural change in the distal haem pocket has a remarkable effect on tuning hydrogen peroxide reactivity in dye decolourising peroxidases fromStreptomyces lividans
Source: Royal Society of Chemistry journal article supplement (doi:10.1039/c9dt04583j), 2020-01-01
Supplement: c9dt04583j1.pdf [file c9dt04583j1.pdf]

## Supporting Information

### **A subtle structural change in the distal haem pocket has a remarkable effect on tuning hydrogen peroxide reactivity in dye decolourising peroxidases from *Streptomyces lividans***

Marina Lučić,<sup>1</sup> Amanda K. Chaplin,<sup>1†</sup> Tadeo Moreno-Chicano,<sup>1§</sup> Florian S.N. Dworkowski,<sup>2</sup>  
Michael T. Wilson,<sup>1</sup> Dimitri A. Svistunenko,<sup>1</sup> Michael A. Hough,<sup>1</sup> Jonathan A.R. Worrall<sup>1</sup>

<sup>1</sup>School of Life Sciences, University of Essex, Wivenhoe Park, Colchester, CO4 3SQ, UK.

<sup>2</sup>Swiss Light Source, Paul Scherrer Institute, Villigen PSI, CH-5232, Switzerland.

Current address: <sup>†</sup>Department of Biochemistry, Sanger Building, 80 Tennis Court Road,  
Cambridge CB2 1GA, UK. <sup>§</sup>Institut de Biologie Structurale, 71 Avenue des Martyrs, 38000  
Grenoble, France.

## RESULTS

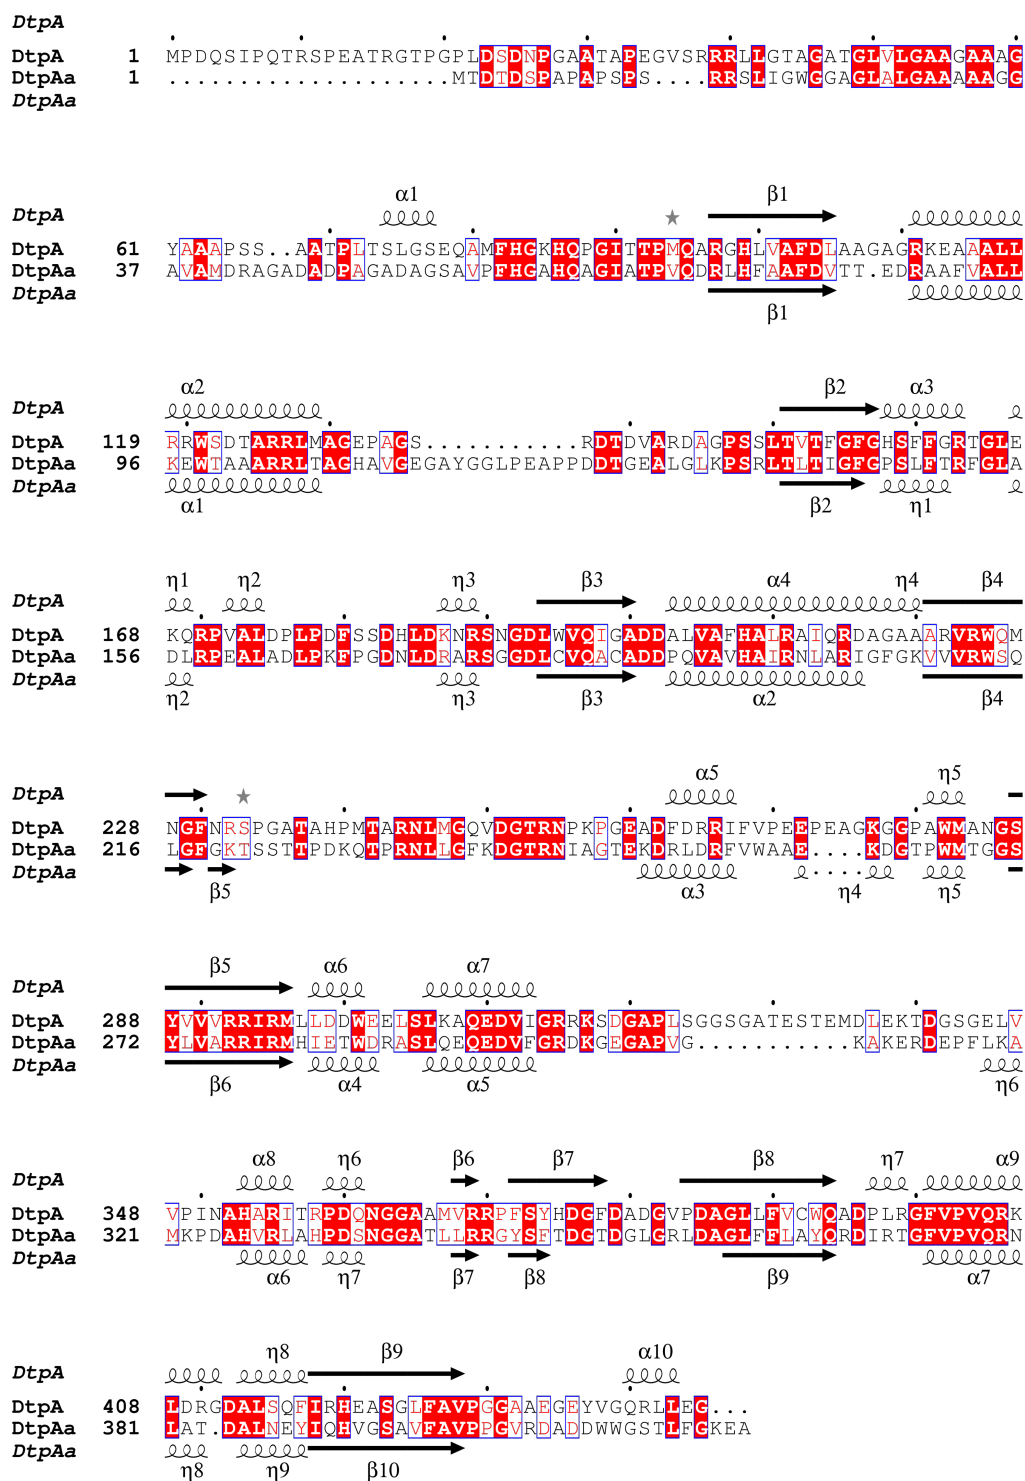

**Figure S1:** Amino acid sequence alignment of DtpA and DtpAa from *Streptomyces lividans*. ESPript 3.0<sup>1</sup> was used to generate the alignment and calculate a sequence identity of 43.09 % as indicated by residues in a red box. Secondary structure elements as determined from the respective X-ray structures of DtpA and DtpAa are also depicted.

A

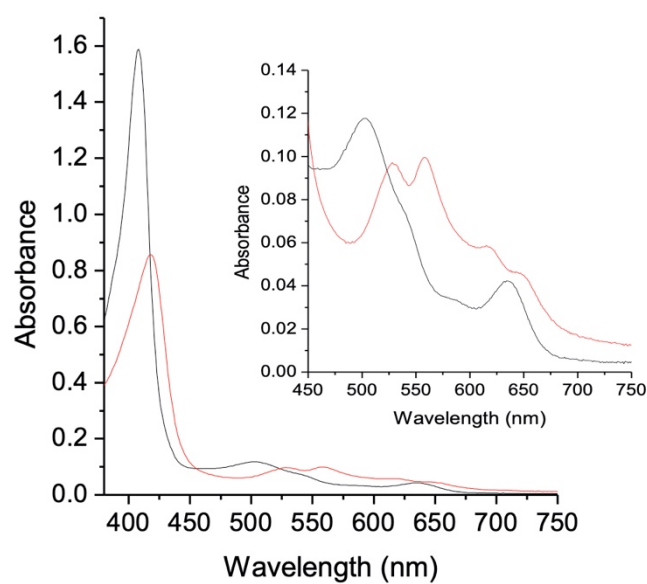

B

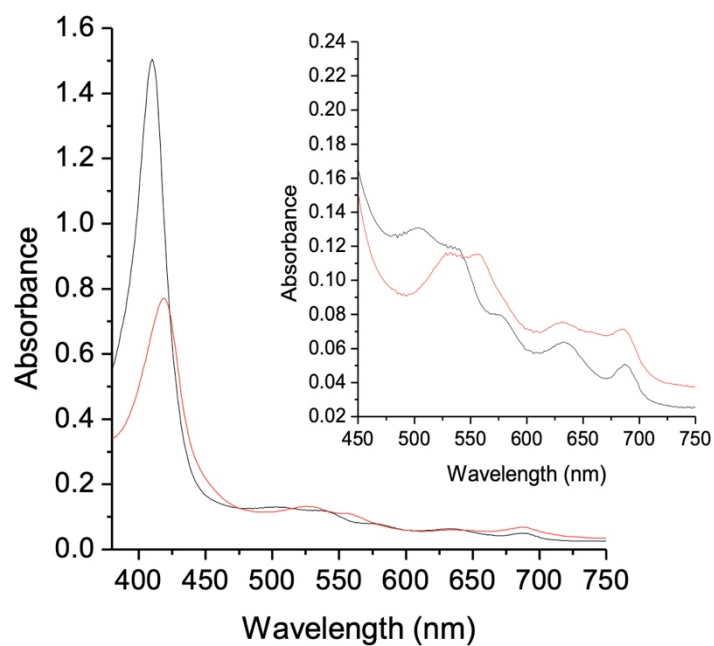

**Figure S2:** Absorbance spectra of the Asp variants at pH 7.0. A) The D251A DtpA variant and B) the D239A DtpAa variant. The black spectra indicates the ferric form and the red spectra following addition of one molar equivalent of  $\text{H}_2\text{O}_2$ . Insets show a close-up of the Q-bands.

## REFERENCES

1. X. Robert and P. Gouet, *Nucleic acids research*, 2014, **42**, W320-324.
